# Supplementary material for: RNase A Treatment Interferes With Leukocyte Recruitment, Neutrophil Extracellular Trap Formation, and Angiogenesis in Ischemic Muscle Tissue
Source: PubMed Central journal article supplement (PMC7677187; doi:10.3389/fphys.2020.576736), 2020-11-06
Supplement: Table_1.pdf [file Table_1.pdf]

|           |          | Figure 2A         |
|-----------|----------|-------------------|
| Mouse     |          | tissue damage (%) |
| Saline 1  | ischemic | 7.8               |
| Saline 2  | ischemic | 10.0              |
| Saline 3  | ischemic | 16.2              |
| Saline 4  | ischemic | 10.4              |
| Saline 5  | ischemic | 13.0              |
| RNase A 1 | ischemic | 31.3              |
| RNase A 2 | ischemic | 18.7              |
| RNase A 3 | ischemic | 32.5              |
| RNase A 4 | ischemic | 27.7              |
| RNase A 5 | ischemic | 27.2              |

**Supplementary Table 1: Raw Data of Figure 2A**
