# Supplementary material for: RNase A Treatment Interferes With Leukocyte Recruitment, Neutrophil Extracellular Trap Formation, and Angiogenesis in Ischemic Muscle Tissue
Source: PubMed Central journal article supplement (PMC7677187; doi:10.3389/fphys.2020.576736), 2020-11-06
Supplement: Table_2.pdf [file Table_2.pdf]

|           |              | Figure 2C                                                                     | Figure 3                                                |                                                         | Figure 4                                                |                                                                            |                                                                            | Figure 5                                     |                                                        | Suppl. Figure 1                                                                                   |
|-----------|--------------|-------------------------------------------------------------------------------|---------------------------------------------------------|---------------------------------------------------------|---------------------------------------------------------|----------------------------------------------------------------------------|----------------------------------------------------------------------------|----------------------------------------------|--------------------------------------------------------|---------------------------------------------------------------------------------------------------|
| Mouse     |              | CD31 <sup>+</sup> /ACTA2 <sup>-</sup><br>cells<br>(ratio per<br>muscle fiber) | CD45 <sup>+</sup><br>cells<br>(per<br>mm <sup>2</sup> ) | Ly6G <sup>+</sup><br>cells<br>(per<br>mm <sup>2</sup> ) | CD68 <sup>+</sup><br>cells<br>(per<br>mm <sup>2</sup> ) | CD68 <sup>+</sup> /MRC1 <sup>-</sup><br>cells<br>(% of CD68 <sup>+</sup> ) | CD68 <sup>+</sup> /MRC1 <sup>+</sup><br>cells<br>(% of CD68 <sup>+</sup> ) | NETs<br>expression<br>(per mm <sup>2</sup> ) | MPO <sup>+</sup><br>cells<br>(per<br>mm <sup>2</sup> ) | CD31 <sup>+</sup> /BrdU <sup>+</sup> /<br>ACTA2 <sup>-</sup> cells<br>(ratio per<br>muscle fiber) |
| Saline 1  | ischemic     | 2.287                                                                         | 405                                                     | 89                                                      | 44                                                      | 93                                                                         | 7                                                                          | 2.47                                         | 0.812                                                  | 0.694                                                                                             |
|           | non-ischemic | 1.186                                                                         | 53                                                      | 14                                                      | 13                                                      |                                                                            |                                                                            | 0.15                                         | 0.018                                                  | 0.019                                                                                             |
| Saline 2  | ischemic     | 2.831                                                                         | 460                                                     | 108                                                     | 43                                                      | 88                                                                         | 12                                                                         | 3.60                                         | 0.844                                                  | 0.942                                                                                             |
|           | non-ischemic | 1.370                                                                         | 55                                                      | 17                                                      | 11                                                      |                                                                            |                                                                            | 0.29                                         | 0.022                                                  | 0.025                                                                                             |
| Saline 3  | ischemic     | 2.542                                                                         | 432                                                     | 92                                                      | 44                                                      | 84                                                                         | 16                                                                         | 3.40                                         | 0.876                                                  | 0.954                                                                                             |
|           | non-ischemic | 1.194                                                                         | 58                                                      | 17                                                      | 12                                                      |                                                                            |                                                                            | 0.29                                         | 0.016                                                  | 0.019                                                                                             |
| RNase A 1 | ischemic     | 1.574                                                                         | 163                                                     | 24                                                      | 22                                                      | 14                                                                         | 86                                                                         | 1.16                                         | 0.473                                                  | 0.445                                                                                             |
|           | non-ischemic | 1.110                                                                         | 60                                                      | 15                                                      | 11                                                      |                                                                            |                                                                            | 0.39                                         | 0.019                                                  | 0.019                                                                                             |
| RNase A 2 | ischemic     | 1.649                                                                         | 141                                                     | 31                                                      | 28                                                      | 18                                                                         | 82                                                                         | 1.28                                         | 0.509                                                  | 0.514                                                                                             |
|           | non-ischemic | 1.158                                                                         | 57                                                      | 15                                                      | 13                                                      |                                                                            |                                                                            | 0.35                                         | 0.024                                                  | 0.024                                                                                             |
| RNase A 3 | ischemic     | 1.634                                                                         | 178                                                     | 40                                                      | 28                                                      | 11                                                                         | 89                                                                         | 1.30                                         | 0.440                                                  | 0.487                                                                                             |
|           | non-ischemic | 1.096                                                                         | 57                                                      | 22                                                      | 11                                                      |                                                                            |                                                                            | 0.30                                         | 0.018                                                  | 0.018                                                                                             |

**Supplementary Table 2: Raw Data of Figure 2 – Supplementary Figure 1**
